# Supplementary material
Source: PubMed Central journal article supplement (PMC6050935)
Supplement: ASN.2018010096SupplementaryData1.pdf [file ASN.2018010096SupplementaryData1.pdf]

## **SUPPLEMENTARY MATERIAL**

### **Complete Methods**

**Supplementary Table 1:** International Classification of Diseases, Ninth Revision, Clinical Modification (ICD-9-CM) Diagnosis Codes for Ascertainment of Diagnoses Associated with Gabapentin and Pregabalin Use

**Supplementary Table 2:** International Classification of Diseases, Ninth Revision, Clinical Modification (ICD-9-CM) Diagnosis and Current Procedural Terminology (CPT) Codes for Altered Mental Status, Fall, and Fracture Ascertainment

**Supplementary Table 3:** International Classification of Diseases, Ninth Revision, Clinical Modification (ICD-9-CM) Diagnosis and Procedure Codes for Comorbidity Ascertainment

**Supplementary Table 4:** Dose of Gabapentin and Pregabalin by Diagnosis

**Supplementary Table 5:** Total Number of Days Spent within Each Dose Category and Number and Percentage of Individuals with at Least One Prescription in Each Dose Category during Follow-up

**Supplementary Table 6:** Risk of Altered Mental Status, Fall, and Fracture by Gabapentin and Pregabalin Dose Category (Low-Income Subsidy Sensitivity Analysis)

### **Supplementary References**

## **COMPLETE METHODS**

### **Study Design, Data Sources, and Population:**

We conducted a cohort study using the 2013 standard analytic and Medicare payment files in the United States Renal Data System (USRDS), which includes clinical and prescription drug data from 2011.<sup>1</sup> This study was not considered human subjects research by the University of California, San Francisco Committee on Human Research.

### **Diagnoses Associated with Gabapentin and Pregabalin Use:**

Gabapentin is FDA-approved for the treatment of epilepsy and post-herpetic neuralgia,<sup>2</sup> but it is commonly used off-label for conditions such as neuropathic pain, diabetic neuropathy, trigeminal neuralgia, and restless legs syndrome.<sup>3</sup> Pregabalin is FDA-approved for the treatment neuropathic pain associated with diabetic peripheral neuropathy, post-herpetic neuralgia, adjunctive therapy for partial onset seizures, and fibromyalgia, and it is also approved for the treatment of generalized anxiety disorder in Europe.<sup>4,5</sup> We were interested in capturing the prevalence of both on-label and off-label diagnoses associated with gabapentin and pregabalin use, including specific diagnoses that have been evaluated in hemodialysis patients (e.g., neuropathic pain, pruritus, and restless legs syndrome).<sup>6-15</sup> Diagnoses of interest were captured using International Classification of Diseases, Ninth Revision, Clinical Modification (ICD-9-CM) codes (**Supplementary Table 1**).

### **Gabapentin and Pregabalin Exposure Variables:**

Ascertainment of gabapentin and pregabalin exposure was started in January 2011, and we delayed ascertainment of the outcomes until February 2011 to allow for determination of prior exposure.

Gabapentin and pregabalin exposure were modeled as separate time-varying predictors. Our database was structured such that there was a record for every person for each day of observation. With this database structure, we defined periods of medication possession as the period starting from the date of service of a prescription continuing until the days supply of the prescription was completed.<sup>16</sup> The time at risk began on the first day of the prescription claim. Gaps between prescriptions were considered as periods of non-exposure. For each period of medication possession, we calculated a daily dose averaged over the duration of the prescription and classified periods of exposure into the following dose categories for gabapentin (0 mg, >0-100 mg, >100-200 mg, >200-300 mg, >300 mg) and pregabalin (0 mg, >0-100 mg, >100 mg).

### **Outcome Variables:**

We examined first episode of altered mental status, fall, and fracture requiring an emergency room visit or hospitalization during 2011 in separate models. Using our continuous database structure, we were able to assign event dates to the outcomes of interest, and we stopped classifying days as time at risk after the occurrence of the first events. Outcomes were ascertained from the revenue, physician/supplier, and institutional claims files using ICD-9-CM diagnosis and Current Procedural Terminology (CPT) codes (**Supplementary Table 2**). The sensitivity, specificity, and positive predictive value for using ICD-9-CM codes to identify fall (73-95%, 88-97%, and 62-86%, respectively)<sup>17, 18</sup> and fracture (75-100%, 97-100%, and 69-99%, respectively)<sup>19-21</sup> were generally higher than those for delirium (3-50%, 99-100%, and 28-100%).<sup>22-25</sup> Delirium represents a subset of altered mental status, and we defined altered mental status using a broad listing of ICD-9-CM codes that captured terms including delirium and alteration of mental status or consciousness, confusion,

encephalopathy, hallucination, intoxication, and drug-induced delirium, delusion, hallucination, and psychosis.<sup>22-31</sup> We based our methodology for coding fall and fracture on prior work examining these outcomes among patients with end-stage renal disease in the USRDS.<sup>32-37</sup> Fractures of interest included those of the hip, femur, pelvis, leg, foot, arm, hand, or axial skeleton. We included emergency room visits in which there was a code for the outcomes and hospitalizations in which the outcomes were identified as the primary diagnosis according to standard USRDS methodology.<sup>38</sup>

### **Statistical Analysis:**

We calculated the prevalence of at least one prescription for gabapentin and pregabalin during 2011, and among those with at least one prescription for these agents, we calculated the prevalence of at least one high dose prescription (defined as >300 mg for gabapentin and >100 mg for pregabalin). For Table 1, patients were categorized into two groups: receipt of at least one prescription for gabapentin or pregabalin in 2011 or no use of these agents in 2011. Baseline characteristics are presented as means and standard deviations or medians with interquartile ranges for continuous variables and percentages for categorical variables. We compared characteristics of those who received gabapentin or pregabalin versus those who did not using Mann-Whitney and chi-squared tests. We calculated outcome rates, expressed as the number of events per 100 person-years, with follow-up time partitioned according to gabapentin dose category (0 mg, >0-100 mg, >100-200 mg, >200-300 mg, >300 mg) and pregabalin dose category (0 mg, >0-100 mg, >100 mg). Among individuals with at least one prescription for gabapentin and pregabalin in 2011, we ascertained diagnoses associated with use of gabapentin and pregabalin according to whether a relevant ICD-9-CM code was present

within 60 days prior to the date of service of each prescription in the Medicare Part D prescription drug file.

For each predictor and outcome analysis, we constructed a Cox model using a time-varying definition of gabapentin and pregabalin exposure in order to compare the hazard of each outcome during each dose category compared to no use. We controlled for the following potential confounders: baseline demographic characteristics (i.e., age, duration on dialysis, sex, race, geographic location of ESRD network as defined by US Census geographic divisions, body mass index, comorbidities [i.e., alcohol dependence, coronary artery disease, cancer, other cardiac disease, dysrhythmia, congestive heart failure, cerebrovascular disease, diabetes, drug dependence, opioid dependence, hypertension, inability to ambulate, inability to transfer, chronic obstructive pulmonary disease, peripheral vascular disease, tobacco dependence, liver disease, dementia, depression, seizures/epilepsy], and medication burden (i.e., total number of unique medications prescribed at baseline). We also adjusted for duration of gabapentin and pregabalin exposure to account for the possibility of differential associations according to shorter duration of exposure (less than 30 days) compared to longer duration of exposure (greater than or equal to 30 days). Comorbidities were ascertained using the USRDS Medical Evidence Report and ICD-9-CM diagnosis and procedure codes. Specifically, we included diagnoses indicated at the time of dialysis initiation on the USRDS Medical Evidence Report or present on two outpatient claims or one inpatient claim during 2010 in the institutional claims or physician/supplier files (**Supplementary Table 3**).<sup>39-42</sup> We adjusted for use of concomitant medications that could affect risk of the outcomes (e.g., benzodiazepines, antidepressants with anticholinergic properties) as a time-varying covariate. We included anticholinergic antidepressants

in particular because their side effects (e.g., sedation, orthostatic hypotension) could predispose to fall and fracture.<sup>43, 44</sup>

Patients were censored from the study cohort at the time of death, kidney transplantation, change in modality, uncertain or recovered function, withdrawal from dialysis, loss to follow-up, discontinuation of Part D coverage or end of the study period. We also performed a sensitivity analysis to account for potential misclassification of the exposure related to the Medicare Part D coverage gap (i.e., “donut hole”) that occurs every calendar year, beginning when the initial coverage limit has been exceeded and ending when catastrophic coverage begins.<sup>38</sup> The Part D program offers a low-income subsidy (LIS) that provides full or partial coverage during the coverage gap.

Medication persistence and adherence have been shown to be higher in patients with end-stage renal disease who have the LIS.<sup>45</sup> Thus, we performed an analysis restricting to patients with the LIS.<sup>46</sup> We considered a two-tailed p-value <0.05 to be statistically significant. We used SAS version 9.4 (SAS Institute, Inc., Cary, NC) for all analyses.

**Supplementary Table 1: International Classification of Diseases, Ninth Revision, Clinical Modification (ICD-9-CM) Diagnosis Codes for Ascertainment of Diagnoses Associated with Gabapentin and Pregabalin Use**

| <b>Diagnosis</b>                         | <b>ICD-9-CM Codes</b>                                                                                                                                                                                                                                                                                                                                    |
|------------------------------------------|----------------------------------------------------------------------------------------------------------------------------------------------------------------------------------------------------------------------------------------------------------------------------------------------------------------------------------------------------------|
| Neuropathic pain                         | 053.20, 053.21, 053.22, 249.0, 249.6, 250.0, 250.6, 337.1, 337.20, 337.21, 337.22, 337.29, 337.9, 338.0, 349.89, 349.9, 350, 350.01, 350.1, 350.2, 350.50, 350.8, 350.9, 354.4, 354.9, 355.40, 355.71, 355.8, 355.9, 356.0, 356.01, 356.9, 357.2, 357.4, 585.9, 722.30, 723.8, 724.3, 724.4, 729.2, 780.96                                               |
| Pruritus                                 | 698, 698.0, 698.1, 698.2, 698.3, 698.4, 698.8, 698.9                                                                                                                                                                                                                                                                                                     |
| Restless legs syndrome                   | 333.94                                                                                                                                                                                                                                                                                                                                                   |
| Seizures/epilepsy                        | 345.0, 345.1, 345.2, 345.3, 345.4, 345.5, 345.6, 345.7, 345.8, 345.9                                                                                                                                                                                                                                                                                     |
| Fibromyalgia                             | 729.1                                                                                                                                                                                                                                                                                                                                                    |
| Bipolar                                  | 296.0, 296.00, 296.01, 296.02, 296.03, 296.04, 296.05, 296.06, 296.1, 296.10, 296.11, 296.12, 296.13, 296.14, 296.15, 296.16, 296.4, 296.40, 296.41, 296.42, 296.43, 296.44, 296.45, 296.46, 296.5, 296.50, 296.51, 296.52, 296.53, 296.54, 296.55, 296.56, 296.6, 296.60, 296.61, 296.62, 296.63, 296.64, 296.65, 296.66, 296.7, 296.80, 296.81, 296.89 |
| Depression                               | 296.2, 296.3                                                                                                                                                                                                                                                                                                                                             |
| Attention deficit hyperactivity disorder | 314.00, 314.01, 314.8                                                                                                                                                                                                                                                                                                                                    |
| Anxiety                                  | 293.84, 300.0, 300.00, 300.01, 300.02, 300.09, 300.21, 300.22, 300.23, 300.29, 300.3, 308.3, 309.81                                                                                                                                                                                                                                                      |
| Periodic limb movement of sleep          | 327.51                                                                                                                                                                                                                                                                                                                                                   |
| Insomnia                                 | 307.40, 307.41, 307.42, 307.47, 307.48, 327.00, 327.01, 327.02, 327.09, 780.50, 780.52, 780.55, 780.56, 780.59                                                                                                                                                                                                                                           |
| Migraine                                 | 346.00, 346.01, 346.10, 346.11, 346.9                                                                                                                                                                                                                                                                                                                    |
| Withdrawal seizures                      | 291.81, 292.0                                                                                                                                                                                                                                                                                                                                            |

**Supplementary Table 2: International Classification of Diseases, Ninth Revision, Clinical Modification (ICD-9-CM) Diagnosis and Current Procedural Terminology (CPT) Codes for Altered Mental Status, Fall, and Fracture Ascertainment**

| <b>Outcome</b>               | <b>ICD-9-CM Codes</b>                                                                                                                                                          | <b>CPT Codes</b>                                                                                                                                                                                                                                                                                                                                                                                                                                                             |
|------------------------------|--------------------------------------------------------------------------------------------------------------------------------------------------------------------------------|------------------------------------------------------------------------------------------------------------------------------------------------------------------------------------------------------------------------------------------------------------------------------------------------------------------------------------------------------------------------------------------------------------------------------------------------------------------------------|
| <i>Altered mental status</i> | 292.11, 292.12, 292.2, 292.81, 292.84, 292.89, 292.9, 293.0, 293.1, 298.9, 348.30, 348.39, 349.82, 760.72, 760.77, 780.02, 780.09, 780.1, 780.97                               |                                                                                                                                                                                                                                                                                                                                                                                                                                                                              |
| <i>Fall</i>                  | E880.0, E880.1, E880.9, E884.9, E884.2, E884.3, E884.4, E884.5, E884.6, E885.0, E885.9, E888.0, E888.1, E888.8, E888.9                                                         |                                                                                                                                                                                                                                                                                                                                                                                                                                                                              |
| <i>Fracture</i>              |                                                                                                                                                                                |                                                                                                                                                                                                                                                                                                                                                                                                                                                                              |
| Hip/femur                    | 733.14, 733.15, 820.xx, 821.xx                                                                                                                                                 | 27125, 27220, 27222, 27226, 27227, 27228, 27230, 27232, 27235, 27236, 27238, 27240, 27244, 27245, 27246, 27248, 27254, 27500, 27501, 27502, 27503, 27506, 27507, 27508, 27509, 27510, 27511, 27513, 27514                                                                                                                                                                                                                                                                    |
| Pelvis                       | 808.xx                                                                                                                                                                         | 27190, 27193, 27194, 27215, 27216, 27217, 27218, 27200, 27202                                                                                                                                                                                                                                                                                                                                                                                                                |
| Leg/foot                     | 733.16 (path tibia), 822.xx (patella), 823.xx (tibia & fibula), 824.xx (ankle), 825.xx (tarsal, metatarsal), 826.xx (phalanges)                                                | 27350, 27520, 27524, 27530, 27532, 27535, 27536, 27538, 27540, 27750, 27752, 27756, 27758, 27759, 27760, 27762, 27766, 27767, 27768, 27769, 27780, 27781, 27784, 27786, 27788, 27792, 27808, 27810, 27814, 27816, 27818, 27822, 27823, 27824, 27825, 27826, 27827, 27828, 28315, 28400, 28405, 28406, 28415, 28420, 28430, 28435, 28436, 28445, 28450, 28455, 28456, 28465, 28470, 28475, 28476, 28485, 28490, 28495, 28496, 28505, 28510, 28515, 28525, 29851, 29855, 29856 |
| Arm/hand                     | 733.11 (path humerus), 733.12 (path radius), 812.xx (humerus), 813.xx (radius & ulna), 814.xx (carpal bone, wrist), 815.xx (metacarpal), 816.xx (phalanges), 817.xx (multiple) | 23600, 23605, 23610, 23615, 23616, 23620, 23625, 23630, 23665, 23670, 23675, 23680, 24500, 24505, 24506, 24510, 24515, 24516, 24530, 24531, 24535, 24536, 24538, 24540, 24542, 24545, 24546, 24560, 24565, 24566, 24570, 24575, 24576, 24577, 24579, 24581, 24582, 24583, 24585, 24586, 24587, 24588, 24620, 24625, 24635, 24650, 24655, 24660, 24665, 24666, 24670, 24675, 24680, 24685,                                                                                    |



|       |                                                                               |                                                                                                                                                                                                                                                                                                                                                                                                        |
|-------|-------------------------------------------------------------------------------|--------------------------------------------------------------------------------------------------------------------------------------------------------------------------------------------------------------------------------------------------------------------------------------------------------------------------------------------------------------------------------------------------------|
|       |                                                                               | 25500, 25505, 25510, 25514, 25515, 25520, 25525, 25526, 25530, 25535, 25540, 25541, 25545, 25560, 25565, 25570, 25574, 25575, 25600, 25604, 25605, 25606, 25607, 25608, 25609, 25622, 25624, 25628, 25630, 25635, 25645, 25650, 25651, 25652, 25680, 25685, 26600, 26605, 26607, 26608, 26615, 26645, 26650, 26665, 26720, 26725, 26727, 26735, 26740, 26742, 26746, 26750, 26755, 26756, 26765, 29847 |
| Axial | 807.0x-807.1x, 807.2-807.3 (ribs/sternum); 810.xx, 811.xx (clavicle, scapula) | 21800, 21820, 23500, 23505, 23515, 23570, 23575, 23585                                                                                                                                                                                                                                                                                                                                                 |

Altered mental status was defined using a broad listing of ICD-9-CM codes that captured terms including delirium and alteration of mental status or consciousness, confusion, encephalopathy, hallucination, intoxication, and drug-induced delirium, delusion, hallucination, and psychosis.<sup>22-31</sup> We based our methodology for coding fall and fracture on prior work examining these outcomes among patients with end-stage renal disease in the USRDS.<sup>32-37</sup> Fracture for a given type required the presence of both an ICD-9-CM diagnosis code and CPT code.<sup>32, 34-37</sup> In order to maximize the ability to ascertain incident fractures, we excluded vertebral fractures and required that no fracture of given type occurred within the previous 30 days.<sup>47</sup>

**Supplementary Table 3: International Classification of Diseases, Ninth Revision, Clinical Modification (ICD-9-CM) Diagnosis and Procedure Codes for Comorbidity Ascertainment**

| <b>Comorbidity</b>                    | <b>ICD-9-CM Codes</b>                                                                                                                           |
|---------------------------------------|-------------------------------------------------------------------------------------------------------------------------------------------------|
| Alcohol dependence                    | 291.x, 303.x, 305.x                                                                                                                             |
| Coronary artery disease               | 00.66, 36.0x, 410.x, 411.x, 413.x                                                                                                               |
| Cancer                                | 140.x-165.x, 170.x-172.x, 174.x, 175.x, 180.x-209.x, 238.6, 273.3                                                                               |
| Other cardiac disease                 | v42.2, v43.3, 394.x-397.1, 424.x, 746.3-746.6                                                                                                   |
| Dysrhythmia                           | 37.7x, 37.8x, 37.9x, v45.00, v45.01, v45.02, v45.09, v53.31, v53.32, 426.x, 427.0, 427.1, 427.20, 427.3x, 427.4x, 427.81, 427.9, 996.01, 996.04 |
| Congestive heart failure              | 398.91, 402.01, 402.11, 402.91, 404.01, 404.03, 404.13, 404.91, 428.x                                                                           |
| Cerebrovascular disease               | 433.x, 434.x, 435.x, 436.00, 437.x, 438.x                                                                                                       |
| Diabetes                              | 249.x, 250.x, 357.2, 362.0x                                                                                                                     |
| Drug dependence                       | 292.x, 304.x, 305.x                                                                                                                             |
| Opioid dependence                     | 304.x, 305.5                                                                                                                                    |
| Hypertension                          | 401.0, 401.1, 401.9, 402.x, 403.x, 404.x, 405.x                                                                                                 |
| Chronic obstructive pulmonary disease | 490, 491.x-496                                                                                                                                  |
| Peripheral vascular disease           | 38.03, 38.04, 38.05, 38.08, 38.33-38.48, 39.22-39.29, v43.4, 440.2x, 440.3x, 440.4x, 441.x, 443.x, 445.x, 447.10, 557.10, 557.90                |
| Tobacco dependence                    | 305.1x                                                                                                                                          |
| Liver disease                         | v42.7, 070.x, 456.1, 456.21, 570-573.x                                                                                                          |
| Dementia                              | 290.x, 294.1x, 331.x                                                                                                                            |
| Depression                            | 296.2x, 296.3x, 296.5x, 296.82, 300.40, 301.12, 309.0, 309.10, 311                                                                              |
| Seizures/epilepsy                     | 345.x                                                                                                                                           |

**Supplementary Table 4: Dose of Gabapentin and Pregabalin by Diagnosis**

| <b>Diagnosis</b>                         | <b>Gabapentin Dose (mg)<br/>Median (25<sup>th</sup>-75<sup>th</sup> Percentile)</b> | <b>Pregabalin Dose (mg)<br/>Median (25<sup>th</sup>-75<sup>th</sup> Percentile)</b> |
|------------------------------------------|-------------------------------------------------------------------------------------|-------------------------------------------------------------------------------------|
| Neuropathic pain                         | 300 (200-600)                                                                       | 100 (58-150)                                                                        |
| Anxiety                                  | 300 (200-600)                                                                       | 100 (75-150)                                                                        |
| Insomnia                                 | 300 (200-600)                                                                       | 100 (50-150)                                                                        |
| Fibromyalgia                             | 300 (200-667)                                                                       | 100 (63-150)                                                                        |
| Pruritus                                 | 300 (200-600)                                                                       | 100 (58-150)                                                                        |
| Restless legs syndrome                   | 300 (200-600)                                                                       | 100 (50-150)                                                                        |
| Bipolar                                  | 300 (209-600)                                                                       | 100 (70-150)                                                                        |
| Migraine                                 | 386 (300-700)                                                                       | 150 (75-200)                                                                        |
| Seizures/epilepsy                        | 300 (200-870)                                                                       | 100 (50-150)                                                                        |
| Withdrawal seizures                      | 300 (300-900)                                                                       | 150 (75-200)                                                                        |
| Periodic limb movement of sleep          | 300 (200-600)                                                                       | 133 (75-150)                                                                        |
| Attention deficit hyperactivity disorder | 366 (300-750)                                                                       | 150 (50-250)                                                                        |

**Supplementary Table 5: Total Number of Days Spent within Each Dose Category and Number and Percentage of Individuals with at Least One Prescription in Each Dose Category during Follow-up**

| <b>Gabapentin</b> | <b>Total Number of Days<br/>Median (25<sup>th</sup>-75<sup>th</sup> Percentile)</b> | <b>n (%)</b> |
|-------------------|-------------------------------------------------------------------------------------|--------------|
| >0-100 mg         | 70 (31-172)                                                                         | 5524 (4)     |
| >100-200 mg       | 76 (31-172)                                                                         | 5524 (4)     |
| >200-300 mg       | 75 (31-177)                                                                         | 9532 (7)     |
| >300 mg           | 92 (31-194)                                                                         | 10841 (8)    |
| Any dose          | 117 (38-229)                                                                        | 25737 (18)   |
|                   |                                                                                     |              |
| <b>Pregabalin</b> | <b>Total Number of Days<br/>Median (25<sup>th</sup>-75<sup>th</sup> Percentile)</b> | <b>n (%)</b> |
| >0-100 mg         | 76 (31-178)                                                                         | 3670 (3)     |
| >100 mg           | 88 (31-195)                                                                         | 2421 (2)     |
| Any dose          | 93 (31-211)                                                                         | 5501 (4)     |

Note: Follow-up time spanned from February 2011 until the time of an outcome, censoring event, or 12/31/11. A given person could contribute to multiple dose categories.

**Supplementary Table 6: Risk of Altered Mental Status, Fall, and Fracture by Gabapentin and Pregabalin Dose Category (Low-Income Subsidy Sensitivity Analysis)**

| Dose Category     | Altered Mental Status   |         |                                      |         | Fall                    |         |                                      |         | Fracture                |         |                                      |         |
|-------------------|-------------------------|---------|--------------------------------------|---------|-------------------------|---------|--------------------------------------|---------|-------------------------|---------|--------------------------------------|---------|
|                   | Crude HR<br>(95% CI)    | p-value | Adjusted HR <sup>a</sup><br>(95% CI) | p-value | Crude HR<br>(95% CI)    | p-value | Adjusted HR <sup>a</sup><br>(95% CI) | p-value | Crude HR<br>(95% CI)    | p-value | Adjusted HR <sup>a</sup><br>(95% CI) | p-value |
| <b>Gabapentin</b> |                         |         |                                      |         |                         |         |                                      |         |                         |         |                                      |         |
| None              | 1.00 (ref)              |         | 1.00 (ref)                           |         | 1.00 (ref)              |         | 1.00 (ref)                           |         | 1.00 (ref)              |         | 1.00 (ref)                           |         |
| >0-100 mg         | 1.34<br>(1.17-<br>1.53) | <.001   | 1.06<br>(0.93-<br>1.21)              | 0.40    | 1.64<br>(1.37-<br>1.96) | <.001   | 1.28<br>(1.07-<br>1.53)              | 0.007   | 1.27<br>(0.96-<br>1.69) | 0.10    | 0.99<br>(0.75-<br>1.32)              | 0.97    |
| >100-200 mg       | 1.68<br>(1.49-<br>1.90) | <.001   | 1.33<br>(1.18-<br>1.50)              | <0.001  | 1.88<br>(1.58-<br>2.23) | <.001   | 1.42<br>(1.20-<br>1.69)              | <0.001  | 1.47<br>(1.15-<br>1.89) | 0.003   | 1.14<br>(0.89-<br>1.46)              | 0.31    |
| >200-300 mg       | 1.81<br>(1.65-<br>1.98) | <.001   | 1.42<br>(1.29-<br>1.55)              | <0.001  | 1.76<br>(1.53-<br>2.03) | <.001   | 1.35<br>(1.17-<br>1.55)              | <0.001  | 1.28<br>(1.03-<br>1.60) | 0.03    | 1.04<br>(0.83-<br>1.30)              | 0.73    |
| >300 mg           | 1.93<br>(1.77-<br>2.09) | <.001   | 1.51<br>(1.39-<br>1.64)              | <0.001  | 2.12<br>(1.89-<br>2.38) | <.001   | 1.56<br>(1.39-<br>1.75)              | <0.001  | 1.74<br>(1.45-<br>2.08) | <.001   | 1.38<br>(1.15-<br>1.65)              | 0.0005  |
| <b>Pregabalin</b> |                         |         |                                      |         |                         |         |                                      |         |                         |         |                                      |         |
| None              | 1.00 (ref)              |         | 1.00 (ref)                           |         | 1.00 (ref)              |         | 1.00 (ref)                           |         | 1.00 (ref)              |         | 1.00 (ref)                           |         |
| >0-100 mg         | 1.89<br>(1.63-<br>2.19) | <.001   | 1.47<br>(1.27-<br>1.70)              | <0.001  | 1.57<br>(1.24-<br>1.97) | 0.0001  | 1.17<br>(0.93-<br>1.47)              | 0.19    | 1.80<br>(1.30-<br>2.49) | 0.0004  | 1.41<br>(1.02-<br>1.95)              | 0.04    |
| >100 mg           | 1.84<br>(1.56-<br>2.18) | <.001   | 1.47<br>(1.24-<br>1.74)              | <0.001  | 2.16<br>(1.72-<br>2.72) | <.001   | 1.65<br>(1.31-<br>2.08)              | <0.001  | 1.66<br>(1.15-<br>2.38) | 0.006   | 1.40<br>(0.97-<br>2.02)              | 0.07    |

Abbreviations: HR = hazard ratio, CI = confidence interval

Based on 108,901 (77%) of the cohort that received the low-income subsidy for the entire study duration.

<sup>a</sup>Results are adjusted for age, sex, race, duration on dialysis, network, body mass index, alcohol dependence, coronary artery disease, cancer,

other cardiac disease, dysrhythmia, congestive heart failure, cerebrovascular disease, diabetes, drug dependence, opioid dependence, hypertension, inability to ambulate, inability to transfer, chronic obstructive pulmonary disease, peripheral vascular disease, tobacco dependence, liver disease, dementia, depression, seizures/epilepsy, medication burden, concomitant medications, and duration of gabapentin or pregabalin exposure.

## Supplementary References

1. Ishida JH, McCulloch CE, Steinman MA, Grimes BA, Johansen KL: Opiate analgesics and adverse outcomes in hemodialysis patients. *Clin J Am Soc Nephrol* 2018
2. US Food and Drug Administration: Gabapentin product information. April 2009
3. Mack A: Examination of the evidence for off-label use of gabapentin. *J Manag Care Pharm* 9: 559-568, 2003
4. US Food and Drug Administration: Pregabalin product information. June 2011
5. European Medicines Agency: Pregabalin summary of product characteristics.
6. Atalay H, Solak Y, Biyik Z, Gaipov A, Guney F, Turk S: Cross-over, open-label trial of the effects of gabapentin versus pregabalin on painful peripheral neuropathy and health-related quality of life in haemodialysis patients. *Clin Drug Investig* 33: 401-408, 2013
7. Gunal AI, Ozalp G, Yoldas TK, Gunal SY, Kirciman E, Celiker H: Gabapentin therapy for pruritus in haemodialysis patients: A randomized, placebo-controlled, double-blind trial. *Nephrol Dial Transplant* 19: 3137-3139, 2004
8. Naini AE, Harandi AA, Khanbabapour S, Shahidi S, Seirafiyan S, Mohseni M: Gabapentin: A promising drug for the treatment of uremic pruritus. *Saudi J Kidney Dis Transpl* 18: 378-381, 2007

9. Nofal E, Farag F, Nofal A, Eldesouky F, Alkot R, Abdelkhalik Z: Gabapentin: A promising therapy for uremic pruritus in hemodialysis patients: A randomized-controlled trial and review of literature. *J Dermatolog Treat* 27: 515-519, 2016
10. Razeghi E, Eskandari D, Ganji MR, Meysamie AP, Togha M, Khashayar P: Gabapentin and uremic pruritus in hemodialysis patients. *Ren Fail* 31: 85-90, 2009
11. Solak Y, Biyik Z, Atalay H, Gaipov A, Guney F, Turk S et al: Pregabalin versus gabapentin in the treatment of neuropathic pruritus in maintenance haemodialysis patients: A prospective, crossover study. *Nephrology (Carlton)* 17: 710-717, 2012
12. Yue J, Jiao S, Xiao Y, Ren W, Zhao T, Meng J: Comparison of pregabalin with ondansetron in treatment of uraemic pruritus in dialysis patients: A prospective, randomized, double-blind study. *Int Urol Nephrol* 47: 161-167, 2015
13. Micozkadioglu H, Ozdemir FN, Kut A, Sezer S, Saatci U, Haberal M: Gabapentin versus levodopa for the treatment of restless legs syndrome in hemodialysis patients: An open-label study. *Ren Fail* 26: 393-397, 2004
14. Razazian N, Azimi H, Heidarnejadian J, Afshari D, Ghadami MR: Gabapentin versus levodopa-c for the treatment of restless legs syndrome in hemodialysis patients: A randomized clinical trial. *Saudi J Kidney Dis Transpl* 26: 271-278, 2015
15. Thorp ML, Morris CD, Bagby SP: A crossover study of gabapentin in treatment of restless legs syndrome among hemodialysis patients. *Am J Kidney Dis* 38: 104-108, 2001



16. Andrade SE, Kahler KH, Frech F, Chan KA: Methods for evaluation of medication adherence and persistence using automated databases. *Pharmacoepidemiol Drug Saf* 15: 565-74; discussion 575-7, 2006
17. McCart JA, Berndt DJ, Jarman J, Finch DK, Luther SL: Finding falls in ambulatory care clinical documents using statistical text mining. *J Am Med Inform Assoc* 20: 906-914, 2013
18. Langley J, Stephenson S, Thorpe C, Davie G: Accuracy of injury coding under ICD-9 for new zealand public hospital discharges. *Inj Prev* 12: 58-61, 2006
19. Ray WA, Griffin MR, Fought RL, Adams ML: Identification of fractures from computerized medicare files. *J Clin Epidemiol* 45: 703-714, 1992
20. Wang WJ, Chao CT, Huang YC, Wang CY, Chang CH, Huang TM et al: The impact of acute kidney injury with temporary dialysis on the risk of fracture. *J Bone Miner Res* 29: 676-684, 2014
21. Narongroeknawin P, Patkar NM, Shakoory B, Jain A, Curtis JR, Delzell E et al: Validation of diagnostic codes for subtrochanteric, diaphyseal, and atypical femoral fractures using administrative claims data. *J Clin Densitom* 15: 92-102, 2012
22. Nebeker JR, Yarnold PR, Soltysik RC, Sauer BC, Sims SA, Samore MH et al: Developing indicators of inpatient adverse drug events through nonlinear analysis using administrative data. *Med Care* 45: S81-8, 2007

23. Inouye SK, Leo-Summers L, Zhang Y, Bogardus ST,Jr, Leslie DL, Agostini JV: A chart-based method for identification of delirium: Validation compared with interviewer ratings using the confusion assessment method. *J Am Geriatr Soc* 53: 312-318, 2005
24. Heisler CA, Melton LJ,3rd, Weaver AL, Gebhart JB: Determining perioperative complications associated with vaginal hysterectomy: Code classification versus chart review. *J Am Coll Surg* 209: 119-122, 2009
25. Hope C, Estrada N, Weir C, Teng CC, Damal K, Sauer BC: Documentation of delirium in the VA electronic health record. *BMC Res Notes* 7: 208-0500-7-208, 2014
26. Lin RY, Heacock LC, Fogel JF: Drug-induced, dementia-associated and non-dementia, non-drug delirium hospitalizations in the united states, 1998-2005: An analysis of the national inpatient sample. *Drugs Aging* 27: 51-61, 2010
27. Bellelli G, Nobili A, Annoni G, Morandi A, Djade CD, Meagher DJ et al: Under-detection of delirium and impact of neurocognitive deficits on in-hospital mortality among acute geriatric and medical wards. *Eur J Intern Med* 26: 696-704, 2015
28. Veeravagu A, Cole TS, Azad TD, Ratliff JK: Improved capture of adverse events after spinal surgery procedures with a longitudinal administrative database. *J Neurosurg Spine* 23: 374-382, 2015

29. Spuhl J, Doing-Harris K, Nelson S, Estrada N, Del Fiol G, Weir C: Concordance of electronic health record (EHR) data describing delirium at a VA hospital. *AMIA Annu Symp Proc* 2014: 1066-1071, 2014
30. Fick DM, Kolanowski AM, Waller JL, Inouye SK: Delirium superimposed on dementia in a community-dwelling managed care population: A 3-year retrospective study of occurrence, costs, and utilization. *J Gerontol A Biol Sci Med Sci* 60: 748-753, 2005
31. Balan S, Leibovitz A, Freedman L, Blagman B, Ruth M, Ady S et al: Seasonal variation in the incidence of delirium among the patients of a geriatric hospital. *Arch Gerontol Geriatr* 33: 287-293, 2001
32. Delgado C, Shieh S, Grimes B, Chertow GM, Dalrymple LS, Kaysen GA et al: Association of self-reported frailty with falls and fractures among patients new to dialysis. *Am J Nephrol* 42: 134-140, 2015
33. Plantinga LC, Patzer RE, Franch HA, Bowling CB: Serious fall injuries before and after initiation of hemodialysis among older ESRD patients in the united states: A retrospective cohort study. *Am J Kidney Dis* 70: 76-83, 2017
34. Ishani A, Liu J, Wetmore JB, Lowe KA, Do T, Bradbury BD et al: Clinical outcomes after parathyroidectomy in a nationwide cohort of patients on hemodialysis. *Clin J Am Soc Nephrol* 10: 90-97, 2015

35. Wetmore JB, Liu J, Wirtz HS, Gilbertson DT, Cooper K, Nieman KM et al:  
Geovariation in fracture risk among patients receiving hemodialysis. *Clin J Am Soc Nephrol* 11: 1413-1421, 2016
36. Doan QV, Gleeson M, Kim J, Borker R, Griffiths R, Dubois RW: Economic burden of cardiovascular events and fractures among patients with end-stage renal disease. *Curr Med Res Opin* 23: 1561-1569, 2007
37. Danese MD, Kim J, Doan QV, Dylan M, Griffiths R, Chertow GM: PTH and the risks for hip, vertebral, and pelvic fractures among patients on dialysis. *Am J Kidney Dis* 47: 149-156, 2006
38. U.S. renal data system, USRDS 2013 annual data report: Atlas of chronic kidney disease and end-stage renal disease in the united states, national institutes of health, national institute of diabetes and digestive and kidney diseases, Bethesda, MD, 2013.
39. Sukumaran Nair S, Lenihan CR, Montez-Rath ME, Lowenberg DW, Chertow GM, Winkelmayer WC: Temporal trends in the incidence, treatment and outcomes of hip fracture after first kidney transplantation in the united states. *Am J Transplant* 14: 943-951, 2014
40. Jette N, Reid AY, Quan H, Hill MD, Wiebe S: How accurate is ICD coding for epilepsy? *Epilepsia* 51: 62-69, 2010

41. Jette N, Beghi E, Hesdorffer D, Moshe SL, Zuberi SM, Medina MT et al: ICD coding for epilepsy: Past, present, and future--a report by the international league against epilepsy task force on ICD codes in epilepsy. *Epilepsia* 56: 348-355, 2015
42. St Germaine-Smith C, Metcalfe A, Pringsheim T, Roberts JI, Beck CA, Hemmelgarn BR et al: Recommendations for optimal ICD codes to study neurologic conditions: A systematic review. *Neurology* 79: 1049-1055, 2012
43. Rudolph JL, Salow MJ, Angelini MC, McGlinchey RE: The anticholinergic risk scale and anticholinergic adverse effects in older persons. *Arch Intern Med* 168: 508-513, 2008
44. By the American Geriatrics Society 2015 Beers Criteria Update Expert Panel: American geriatrics society 2015 updated beers criteria for potentially inappropriate medication use in older adults. *J Am Geriatr Soc* 63: 2227-2246, 2015
45. Park H, Rascati KL, Lawson KA, Barner JC, Richards KM, Malone DC: Adherence and persistence to prescribed medication therapy among medicare part D beneficiaries on dialysis: Comparisons of benefit type and benefit phase. *J Manag Care Spec Pharm* 20: 862-876, 2014
46. Yusuf AA, Howell BL, Powers CA, St Peter WL: Utilization and costs of medications associated with CKD mineral and bone disorder in dialysis patients enrolled in medicare part D. *Am J Kidney Dis* 64: 770-780, 2014

47. Saunders KW, Dunn KM, Merrill JO, Sullivan M, Weisner C, Braden JB et al:

Relationship of opioid use and dosage levels to fractures in older chronic pain patients.

*J Gen Intern Med* 25: 310-315, 2010
