# Supplementary material
Source: PubMed Central journal article supplement (PMC6050935)
Supplement: ASN.2018010096SupplementaryData2.pdf [file ASN.2018010096SupplementaryData2.pdf]

## **SIGNIFICANCE STATEMENT**

Gabapentin and pregabalin are medications used for symptom management in patients receiving hemodialysis. Patients on hemodialysis may be especially vulnerable to complications from the use of these agents, which depend on renal clearance for their elimination, but there is a paucity of data evaluating their risk in this population. In the United States hemodialysis population, gabapentin and pregabalin were associated with risk of altered mental status, fall, and fracture, and in some cases, this risk was present even at dosing that would be considered safe by guidelines. Gabapentin and pregabalin should be used with caution in patients on hemodialysis. Further research focused on identifying the optimal dosing is warranted.
